# Supplementary material
Source: HighWire-hosted journal article supplement (https://bmjopen.bmj.com/content/9/2/e026048)
Supplement: inline-supplementary-material-1 [file inline-supplementary-material-1.pdf]

### Supplementary File 1: Survey questions.

Q1. Which of the following best describes the GP role in which you currently work? (If more than one role select the role in which most hours are worked)

| Answer Choices                      |
|-------------------------------------|
| GP contractor/principal             |
| Practice-employed salaried GP       |
| NHS trust-employed salaried GP      |
| Private sector-employed salaried GP |
| Freelance GP (locum)                |
| Out-of-hours GP                     |
| Other (please specify)              |

Q2. In which other roles are you currently working, or have previously (within last 5 years) worked in general practice? Please select all that apply.

| Answer Choices                                         |
|--------------------------------------------------------|
| CCG role                                               |
| Federation role                                        |
| LMC role                                               |
| Appraiser                                              |
| GP trainer                                             |
| Undergraduate student tutor                            |
| Postgraduate tutor/other educationalist                |
| Research                                               |
| Hospital based clinical assistant                      |
| Community based clinical assistant                     |
| GP with special interest (e.g. sports/family planning) |
| Other (please specify)                                 |

Q3. How long have you been in NHS general practice? (please count all types of service including any time spent as a GP trainee, but exclude any career breaks) Please select

| Answer Choices    |
|-------------------|
| Less than 5 years |
| 5 - 9 years       |
| 10 - 19 years     |
| 20 - 29 years     |
| 30 or more years  |

Q4. Please estimate the TOTAL number of hours you work in General Practice in a typical week (excluding out of hours work but including extended hours and administrative work)

Q4.1. Please estimate the number of CLINICAL hours you spend in direct contact with patients per week

Q5. In the past 2 years have the number of hours you work in General practice

| Answer Choices    |
|-------------------|
| Increased         |
| Remained the same |
| Decreased         |

Q5.1. Which factors have influenced your reduction in hours? Tick all that apply.

| Answer Choices                                         |
|--------------------------------------------------------|
| Increased intensity of workload                        |
| Personal choice, nothing to do with primary care       |
| Financial advice/ pension planning                     |
| Change in role- taking on roles external to GP         |
| Family circumstances e.g. childcare, care for relative |
| Poor physical health                                   |
| Stress or mental health issues                         |
| Other (please comment)                                 |

Q5.2. What factors have resulted in you increasing your hours of work in General Practice?

| Answer Choices                            |
|-------------------------------------------|
| Increased workload                        |
| Compensate for reduction in income        |
| Personal choice unrelated to primary care |
| Change in role                            |
| Other (please specify)                    |

Q6. Over the past 2 years have the number of GP appointments offered per week in your practice

| Answer Choices    |
|-------------------|
| Increased         |
| Remained the same |
| Decreased         |
| Don't know        |

Q6.1. What factors have influenced the decrease in number of GP appointments? Tick all that apply

| Answer Choices                                                                 |
|--------------------------------------------------------------------------------|
| Recruitment problems                                                           |
| Retention problems                                                             |
| Increased skill mix- more nurse/ pharmacist/ physicians associate appointments |
| Decreased workload                                                             |
| Reduced patient demand                                                         |
| Financial pressures                                                            |

|                               |
|-------------------------------|
| <b>Decreased list size</b>    |
| <b>Other (please specify)</b> |

Q6.2. What factors have influenced the increase in number of GP appointments? Tick all which apply

| <b>Answer Choices</b>               |
|-------------------------------------|
| <b>Increased patient demand</b>     |
| <b>Increased list size</b>          |
| <b>Extended hours</b>               |
| <b>Reduced skill mix</b>            |
| <b>Financial pressures</b>          |
| <b>Increased patient complexity</b> |
| <b>Other (please specify)</b>       |

Q7. How long are your routine GP appointments?

Q7.1. How long do you think a routine GP appointment should be?

Q8. Taking everything into account, how would you describe your current level of work-related morale?

| <b>Low</b> |   |   |   | <b>High</b> |
|------------|---|---|---|-------------|
| <b>1</b>   | 2 | 3 | 4 | 5           |

Q8.1 Over the past two years has your level of work-related morale

| <b>Answer Choices</b>    |
|--------------------------|
| <b>Increased</b>         |
| <b>Remained the same</b> |
| <b>Decreased</b>         |
| <b>Please comment</b>    |

Q9. Taking everything into consideration, how satisfied are you in your work as a GP?

| <b>Low</b> |   |   |   | <b>High</b> |
|------------|---|---|---|-------------|
| <b>1</b>   | 2 | 3 | 4 | 5           |

Q9.1 Over the last 2 years has your satisfaction in work as a GP

| <b>Answer Choices</b>    |
|--------------------------|
| <b>Increased</b>         |
| <b>Remained the same</b> |
| <b>Decreased</b>         |
| <b>Please comment</b>    |

Q10. How many years do you plan to continue working as a GP (whether full-time or part-time). Please select

| <b>Answer Choices</b>     |
|---------------------------|
| <b>Less than 1 year</b>   |
| <b>1-2 years</b>          |
| <b>2-5 years</b>          |
| <b>5-10 years</b>         |
| <b>More than 10 years</b> |
| <b>Unsure</b>             |

Q11. Comparing your current GP career plans to your career plans 2 years ago, do you:

| <b>Answer Choices</b>        |
|------------------------------|
| <b>Plan to remain longer</b> |
| <b>Plan to leave earlier</b> |
| <b>No change in plans</b>    |
| <b>Not applicable</b>        |

Q12. In the next five years do you expect to: Please select all that apply

| <b>Answer Choices</b>                                                    |
|--------------------------------------------------------------------------|
| <b>Reduce your hours of clinical work</b>                                |
| <b>Increase your hours of clinical work</b>                              |
| <b>Reduce your management responsibilities</b>                           |
| <b>Increase your management responsibilities</b>                         |
| <b>Reduce your teaching/training/research responsibilities</b>           |
| <b>Increase your teaching/training/research responsibilities</b>         |
| <b>Retire</b>                                                            |
| <b>Leave general practice for an alternative career</b>                  |
| <b>No plans to change</b>                                                |
| <b>Don't know</b>                                                        |
| <b>Please comment on factors which are contributing to this decision</b> |

Q13. If you are intending to retire from NHS general practice within the next 5 years, would you consider continuing to work after retirement? Please select

| <b>Answer Choices</b>  |
|------------------------|
| <b>Yes – fulltime</b>  |
| <b>Yes - part-time</b> |
| <b>No</b>              |
| <b>Unsure</b>          |
| <b>Not applicable</b>  |

Q14. For each of the following factors please indicate how they are contributing to your decision about when to leave or retire.

|                                                | 1 | 2 | 3 | 4 | 5 |
|------------------------------------------------|---|---|---|---|---|
| Volume of workload                             |   |   |   |   |   |
| Intensity of workload                          |   |   |   |   |   |
| Lack of time for patient contact               |   |   |   |   |   |
| Too much time spent on unimportant tasks       |   |   |   |   |   |
| Poor flexibility of hours                      |   |   |   |   |   |
| Potential introduction of 7 day a week working |   |   |   |   |   |
| Reduced job satisfaction                       |   |   |   |   |   |
| Revalidation                                   |   |   |   |   |   |
| Changes to pension taxation                    |   |   |   |   |   |
| Age                                            |   |   |   |   |   |
| Family commitments                             |   |   |   |   |   |
| Ill health                                     |   |   |   |   |   |
| Embarking on career outside general practice   |   |   |   |   |   |
| Planned career break                           |   |   |   |   |   |
| Increased risk of litigation                   |   |   |   |   |   |
| Medical indemnity payments                     |   |   |   |   |   |
| Other (please specify)                         |   |   |   |   |   |

Q15. Please indicate the extent to which each of the following factors might encourage you to remain in general practice?

|                                                                                                                     | 1 | 2 | 3 | 4 | 5 |
|---------------------------------------------------------------------------------------------------------------------|---|---|---|---|---|
| Reduced volume of workload                                                                                          |   |   |   |   |   |
| Reduced intensity of workload                                                                                       |   |   |   |   |   |
| More flexible working conditions                                                                                    |   |   |   |   |   |
| Longer appointment times/more time to spend with patients                                                           |   |   |   |   |   |
| Improved skill-mix in the practice                                                                                  |   |   |   |   |   |
| Shorter practice opening times                                                                                      |   |   |   |   |   |
| Less administration                                                                                                 |   |   |   |   |   |
| No out of hour commitments                                                                                          |   |   |   |   |   |
| Option to work term time only                                                                                       |   |   |   |   |   |
| Greater clinical autonomy                                                                                           |   |   |   |   |   |
| Additional annual leave                                                                                             |   |   |   |   |   |
| Opportunity for a sabbatical                                                                                        |   |   |   |   |   |
| Protected time for education and training                                                                           |   |   |   |   |   |
| Reintroduction of the flexible careers scheme                                                                       |   |   |   |   |   |
| Expansion of GP retainer scheme                                                                                     |   |   |   |   |   |
| Extended interests e.g. CCG role, emergency care role, specialist interest, teaching?                               |   |   |   |   |   |
| Introduction of 'Twenty Plus' (an educational network to support senior GPs to complement RCGP 'First Five' Scheme) |   |   |   |   |   |
| Increased pay                                                                                                       |   |   |   |   |   |

|                                                                                                                          |  |  |  |  |  |
|--------------------------------------------------------------------------------------------------------------------------|--|--|--|--|--|
| Incentive payment to encourage continuing to practice (e.g. indemnity fees covered/reintroduction of seniority payments) |  |  |  |  |  |
| Other (please specify)                                                                                                   |  |  |  |  |  |

Q16. What is the greatest problem within General Practice at the current time?

Q17. What intervention would help General Practice the most?

Q18. Do you find appraisal helpful for your personal development?

| Answer Choices     |
|--------------------|
| No                 |
| Yes                |
| Please explain why |

Q19. In your experience has revalidation changed the nature of your appraisal?

| Answer Choices     |
|--------------------|
| Yes                |
| No                 |
| Please explain why |

Q20. Please consider the following initiatives and for each consider your awareness and experience of the initiative and what impact you believe it will have on General Practice.

|                                                      | Aware of initiative | Have experience initiative in practice | What impact do you believe the initiative will have on General practice? |
|------------------------------------------------------|---------------------|----------------------------------------|--------------------------------------------------------------------------|
| Federation of GP practices                           |                     |                                        |                                                                          |
| Local sustainability and transformation plans (STPs) |                     |                                        |                                                                          |
| Increased use of pharmacists                         |                     |                                        |                                                                          |
| Physicians associates                                |                     |                                        |                                                                          |
| Paramedics in primary care                           |                     |                                        |                                                                          |
| Better Care Fund                                     |                     |                                        |                                                                          |
| Expansion of GP workforce                            |                     |                                        |                                                                          |
| Video and e-consultations                            |                     |                                        |                                                                          |
| Releasing time for patients                          |                     |                                        |                                                                          |

|                                                                         |  |  |  |
|-------------------------------------------------------------------------|--|--|--|
| Practice resilience programme                                           |  |  |  |
| Streamlining CQC, reduced inspection for good and outstanding practices |  |  |  |
| Investment in practice nursing                                          |  |  |  |
| Closer working with specialists eg phone and email advice lines         |  |  |  |
| Investment in technology                                                |  |  |  |
| Investment in primary care infrastructure                               |  |  |  |
| Multi-specialty community provider projects                             |  |  |  |
| Any comments                                                            |  |  |  |

Q21. Which CCG do you work in? Please select

| Answer Choices            |
|---------------------------|
| Banes                     |
| Dorset                    |
| Fareham & Gosport         |
| Hampshire & Isle of Wight |
| Isle of Wight             |
| Jersey                    |
| North Hampshire           |
| NE Hampshire & Farnham    |
| Portsmouth                |
| SE Hampshire              |
| Southampton               |
| Swindon                   |
| W Hampshire               |
| Wiltshire                 |

Q22. What is the total list size of the practice that is your main place of employment? Please select

| Answer Choices  |
|-----------------|
| Less than 4,000 |
| 4,000 – 9,999   |
| 10,000 – 14,999 |
| 15,000 or more  |
| Not applicable  |

Q23. Which of these best describes your practice area? Please select

| <b>Answer Choices</b>  |
|------------------------|
| <b>Inner city</b>      |
| <b>Other urban</b>     |
| <b>Urban/rural mix</b> |
| <b>Semi-rural</b>      |
| <b>Rural</b>           |
| <b>Isolated rural</b>  |

Q24. Gender? Please select

| <b>Answer Choices</b>    |
|--------------------------|
| <b>Male</b>              |
| <b>Female</b>            |
| <b>Other</b>             |
| <b>Prefer not to say</b> |

Q25. Your age? Please select

| <b>Answer Choices</b>   |
|-------------------------|
| <b>25 – 34</b>          |
| <b>35 – 44</b>          |
| <b>45 – 54</b>          |
| <b>55 – 59</b>          |
| <b>60-64</b>            |
| <b>65– 69</b>           |
| <b>70 or more years</b> |

Q26. Country/continent where studied for medical degree? Please select

| <b>Answer Choices</b>         |
|-------------------------------|
| <b>UK and Ireland</b>         |
| <b>Rest of Europe</b>         |
| <b>Asia</b>                   |
| <b>Australia/New Zealand</b>  |
| <b>North America/ Canada</b>  |
| <b>South/ Central America</b> |
| <b>Africa</b>                 |
