# Supplementary material
Source: HighWire-hosted journal article supplement (https://bmjopen.bmj.com/content/9/2/e026048)
Supplement: inline-supplementary-material-2 [file inline-supplementary-material-2.pdf]

## Supplementary File 2 – Full Binary Logistic Regression Results

| Factors associated with intention to retire/leave general practice |                                     |         |       |        |    |       |        |                   |                   |
|--------------------------------------------------------------------|-------------------------------------|---------|-------|--------|----|-------|--------|-------------------|-------------------|
|                                                                    |                                     | B       | S.E   | Wald   | df | Sig   | Exp(B) | 95% CI<br>(Lower) | 95% CI<br>(Upper) |
| Age                                                                | 25 – 34                             |         |       | 32.983 | 6  | 0     |        |                   |                   |
|                                                                    | 35 – 44                             | 0.429   | 0.403 | 1.13   | 1  | 0.288 | 1.535  | 0.696             | 3.385             |
|                                                                    | 45 – 54                             | 0.056   | 0.46  | 0.015  | 1  | 0.903 | 1.057  | 0.429             | 2.605             |
|                                                                    | 55 – 59                             | 2.077   | 0.565 | 13.518 | 1  | 0.000 | 7.982  | 2.638             | 24.157            |
|                                                                    | 60-64                               | 1.956   | 0.735 | 7.088  | 1  | 0.008 | 7.07   | 1.675             | 29.839            |
|                                                                    | 65– 69                              | 1.816   | 1.309 | 1.923  | 1  | 0.166 | 6.145  | 0.472             | 80.009            |
|                                                                    | 70+                                 | 0.646   | 1.341 | 0.232  | 1  | 0.63  | 1.908  | 0.138             | 26.43             |
| Gender                                                             | Male                                |         |       | 1.212  | 2  | 0.546 |        |                   |                   |
|                                                                    | Female                              | 0.381   | 0.58  | 0.432  | 1  | 0.511 | 1.464  | 0.47              | 4.561             |
|                                                                    | Prefer not to say                   | 0.168   | 0.577 | 0.084  | 1  | 0.771 | 1.183  | 0.381             | 3.666             |
| Role                                                               | GP contractor/principal             |         |       | 5.043  | 5  | 0.411 |        |                   |                   |
|                                                                    | Practice-employed salaried GP       | 0.155   | 1.019 | 0.023  | 1  | 0.879 | 1.167  | 0.158             | 8.604             |
|                                                                    | NHS trust-employed salaried GP      | 0.382   | 1.009 | 0.143  | 1  | 0.705 | 1.465  | 0.203             | 10.593            |
|                                                                    | Private sector-employed salaried GP | - 0.027 | 1.122 | 0.001  | 1  | 0.981 | 0.973  | 0.108             | 8.777             |
|                                                                    | Freelance GP (locum)                | 0.109   | 1.409 | 0.006  | 1  | 0.938 | 1.115  | 0.071             | 17.643            |
|                                                                    | Out-of-hours GP                     | 0.87    | 1.001 | 0.755  | 1  | 0.385 | 2.387  | 0.335             | 16.986            |
| Hours                                                              | <10                                 |         |       | 7.957  | 4  | 0.093 |        |                   |                   |
|                                                                    | 11-20                               | 0.191   | 0.51  | 0.141  | 1  | 0.707 | 1.211  | 0.446             | 3.287             |
|                                                                    | 21-30                               | 0.355   | 0.493 | 0.519  | 1  | 0.471 | 1.427  | 0.543             | 3.752             |
|                                                                    | 31-40                               | 0.628   | 0.507 | 1.538  | 1  | 0.215 | 1.874  | 0.694             | 5.06              |
|                                                                    | 41 or more                          | 1.057   | 0.524 | 4.068  | 1  | 0.044 | 2.877  | 1.03              | 8.033             |
| Additional Roles                                                   | None                                |         |       | 0.647  | 2  | 0.724 |        |                   |                   |
|                                                                    | 1                                   | - 0.195 | 0.243 | 0.646  | 1  | 0.422 | 0.823  | 0.511             | 1.324             |
|                                                                    | 2+                                  | - 0.122 | 0.241 | 0.253  | 1  | 0.615 | 0.886  | 0.552             | 1.421             |
| Length of Service                                                  | Less than 5 years                   |         |       | 20.817 | 4  | 0     |        |                   |                   |
|                                                                    | 5 - 9 year4s                        | - 0.356 | 0.396 | 0.807  | 1  | 0.369 | 0.7    | 0.322             | 1.523             |
|                                                                    | 10 - 19 years                       | - 0.066 | 0.411 | 0.026  | 1  | 0.873 | 0.936  | 0.418             | 2.095             |
|                                                                    | 20 - 29 years                       | 1.168   | 0.481 | 5.906  | 1  | 0.015 | 3.217  | 1.254             | 8.254             |
|                                                                    | 30 or more years                    | 0.944   | 0.618 | 2.331  | 1  | 0.127 | 2.569  | 0.765             | 8.626             |
| Job Satisfaction                                                   | Increased                           |         |       | 34.538 | 2  | 0     |        |                   |                   |
|                                                                    | Remained the same                   | 0.426   | 0.317 | 1.808  | 1  | 0.179 | 1.531  | 0.823             | 2.848             |
|                                                                    | Decreased                           | 1.424   | 0.31  | 21.112 | 1  | 0     | 4.152  | 2.262             | 7.621             |

**Association of change in work hours with intention to retire/leave general practice**

|                                          |                   | B     | S.E  | Wald    | df | Sig  | Exp(B) | 95% CI<br>(Lower) | 95% CI<br>(Upper) |
|------------------------------------------|-------------------|-------|------|---------|----|------|--------|-------------------|-------------------|
| Age                                      | 25 – 34           |       |      | 118.027 | 6  | .000 |        |                   |                   |
|                                          | 35 – 44           | .486  | .397 | 1.497   | 1  | .221 | 1.625  | .747              | 3.537             |
|                                          | 45 – 54           | 1.195 | .387 | 9.518   | 1  | .002 | 3.303  | 1.546             | 7.058             |
|                                          | 55 – 59           | 2.791 | .412 | 45.942  | 1  | .000 | 16.293 | 7.270             | 36.514            |
|                                          | 60-64             | 3.196 | .538 | 35.236  | 1  | .000 | 24.427 | 8.504             | 70.165            |
|                                          | 65– 69            | 1.600 | .904 | 3.132   | 1  | .077 | 4.951  | .842              | 29.104            |
|                                          | 70+               | 1.950 | .997 | 3.821   | 1  | .051 | 7.026  | .995              | 49.627            |
| Gender                                   | Male              |       |      | .475    | 2  | .789 |        |                   |                   |
|                                          | Female            | -.111 | .179 | .386    | 1  | .534 | .895   | .630              | 1.271             |
|                                          | Prefer not to say | -.230 | .572 | .162    | 1  | .687 | .794   | .259              | 2.438             |
| Change in hours worked over past 2 years | Increased         |       |      | 6.760   | 2  | .034 |        |                   |                   |
|                                          | Remained the same | -.114 | .215 | .279    | 1  | .597 | .893   | .585              | 1.361             |
|                                          | Decreased         | .467  | .208 | 5.055   | 1  | .025 | 1.595  | 1.062             | 2.397             |
